# Supplementary figures and images for: Knowledge and Surgical Strategies for Successful Laparoscopic Caudate Lobectomy, a Comprehensive Literature Review
Source: Research Square preprint supplement (doi:10.21203/rs.3.rs-877668/v1), 2021-09-28

**Table 1**Study selection flow chart


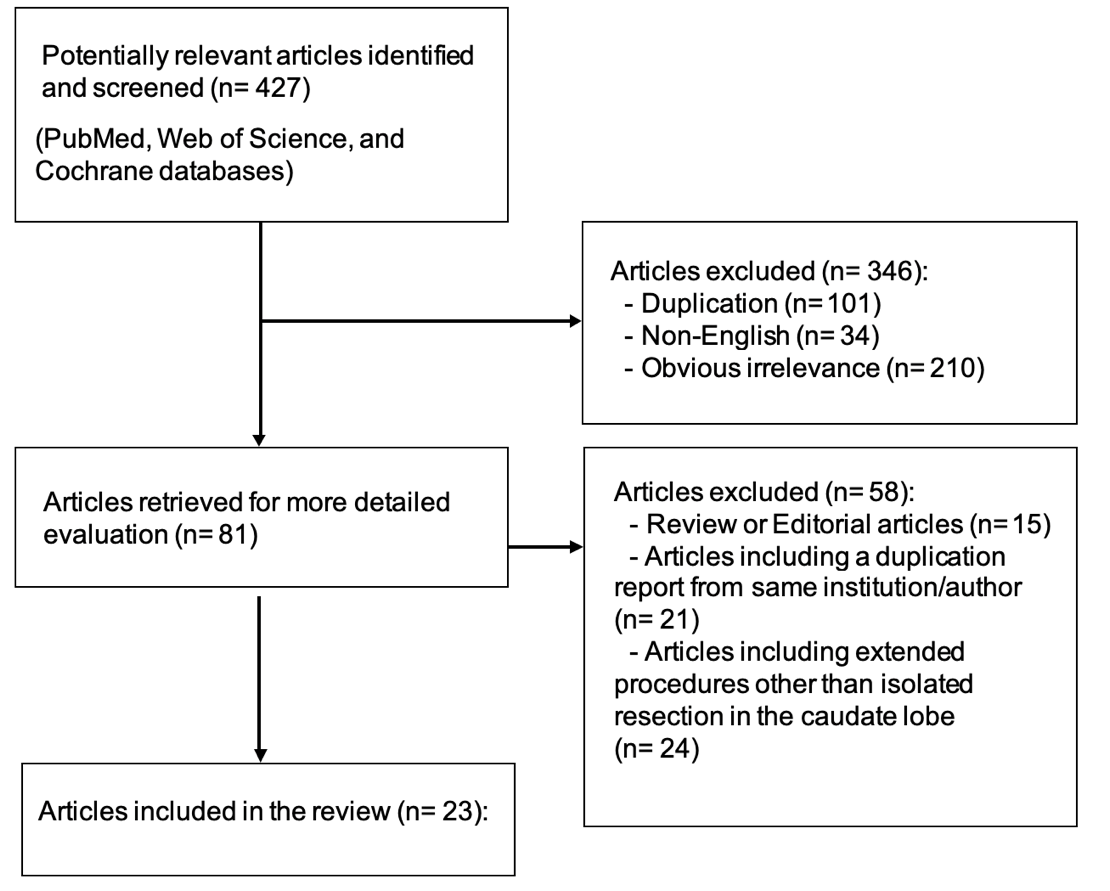

Supplement: Supplementary file 1 [file cfda6e4cfb5039302b192b36.docx]
